# Supplementary material for: Simultaneous improvements in self-cleaning and light-trapping abilities of polymer substrates for flexible organic solar cells
Source: Royal Society of Chemistry journal article supplement (doi:10.1039/c7ta09351a), 2018-01-01
Supplement: c7ta09351a1.pdf [file c7ta09351a1.pdf]

**Electronic Supplementary Information**

**Simultaneous Improvements in Self-cleaning and Light-trapping Abilities of Polymer Substrates for Flexible Organic Solar Cells**

Eunwook Jeong<sup>a,b</sup>, Guoqing Zhao<sup>a</sup>, Myungkwan Song<sup>a</sup>, Seung Min Yu<sup>c</sup>, Jongjoo Rha<sup>a</sup>, Jongmoon Shin<sup>a\*</sup>, Young-Rae Cho<sup>b\*</sup>, and Jungheum Yun<sup>a\*</sup>

<sup>a</sup>Surface Technology Division, Korea Institute of Materials Science, Changwon, Gyeongnam 51508, Republic of Korea

<sup>b</sup>Department of Materials Science and Engineering, Pusan National University, Busan 46241, Republic of Korea

<sup>c</sup>Jeonju Center, Korea Basic Science Institute, Jeonju, Jeonbuk 54907, Republic of Korea

\*Corresponding authors: E-mail: jmshin@kims.re.kr, yescho@pusan.ac.kr, jungheum@kims.re.kr

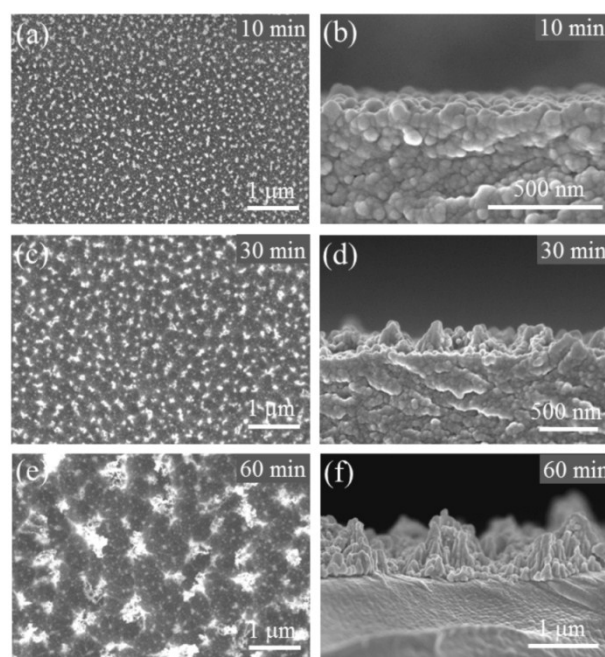

**Fig. S1.** Plane (a, c, e) and cross-sectional (b, d, f) FE-SEM images of polymer protrusions evolved on the surface of PET substrates as a result of plasma treatment for different periods: (a, b) 10 min, (c, d) 30 min, and (e, f) 60 min.

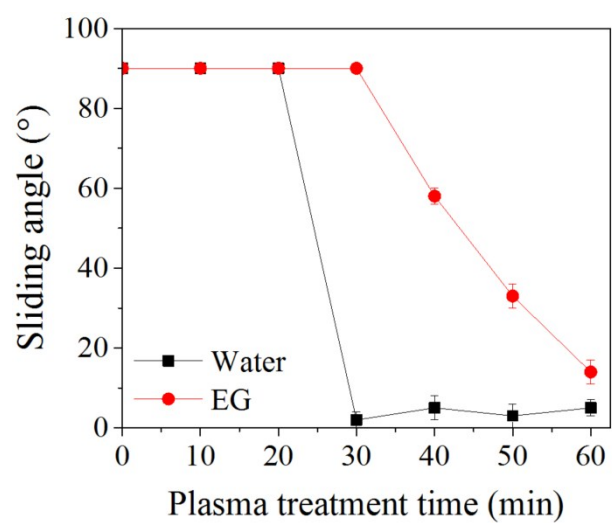

**Fig. S2.** Change in the sliding angle of water and ethylene glycol on the PFOTS-coated SNA layer fabricated with different plasma-treatment times.

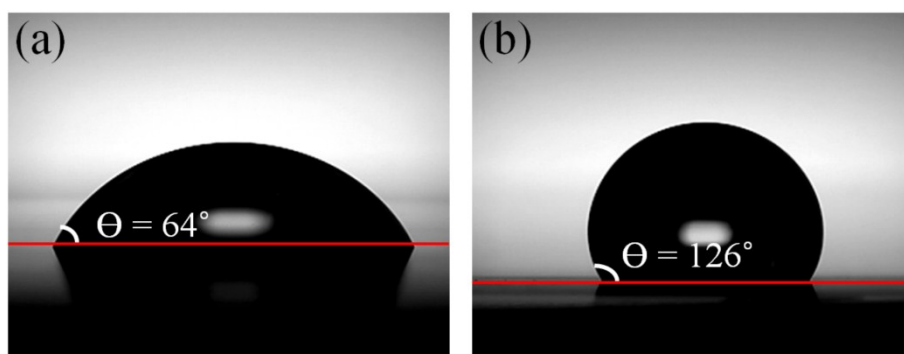

**Fig. S3.** Photographs and contact angles of hexadecane droplets on (a) a PFOTS-terminated PET surface without an SNA layer and (b) a PFOTS-coated SNA layer fabricated on a PET surface plasma-treated for 30 min.

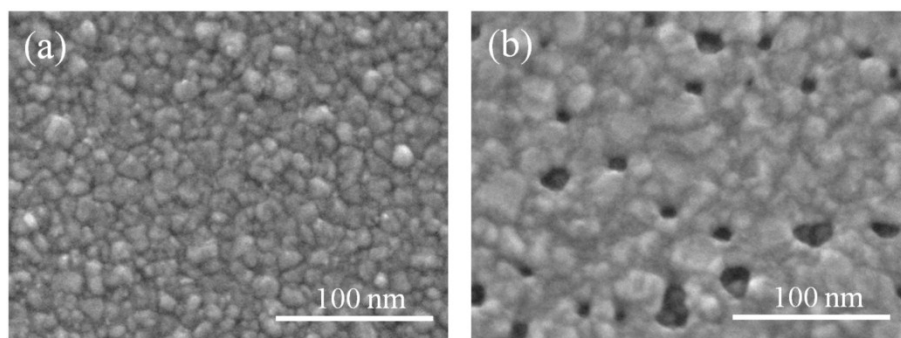

**Fig. S4.** Plane-view FE-SEM images of (a)  $\sim 7$  nm Ag(O) and (b)  $\sim 7$  nm Ag on a 40-nm ZnO film.

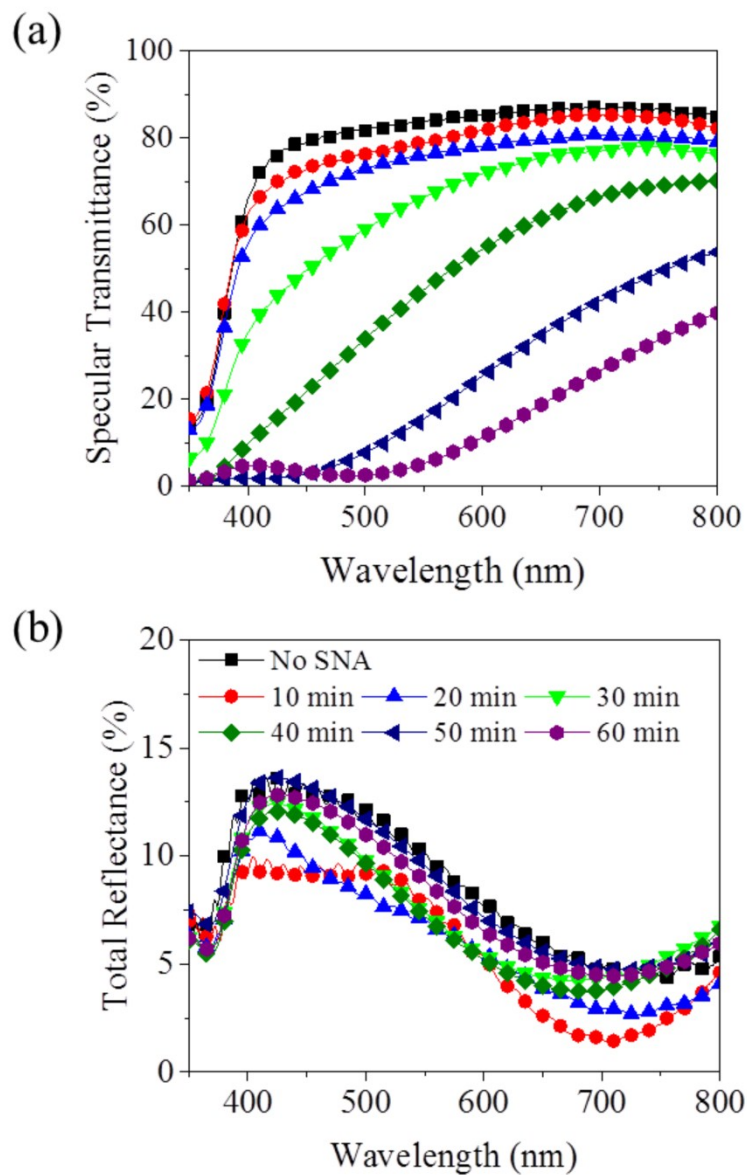

**Fig. S5.** Optical characteristics of PET substrates coated with SNA and OMO layers. Changes in the (a) specular transmittance and (b) total reflectance spectra of the PET substrates as a function of the plasma-treatment time.
